# Supplementary material for: A bacterial outer membrane vesicle-based click vaccine elicits potent immune response against Staphylococcus aureus in mice
Source: PubMed Central journal article supplement (PMC9892643; doi:10.3389/fimmu.2023.1088501), 2023-01-19
Supplement: DataSheet_1.pdf [file DataSheet_1.pdf]

## Supplementary Material

### 1 Supplementary Figures and Tables

#### 1.1 Supplementary Figures

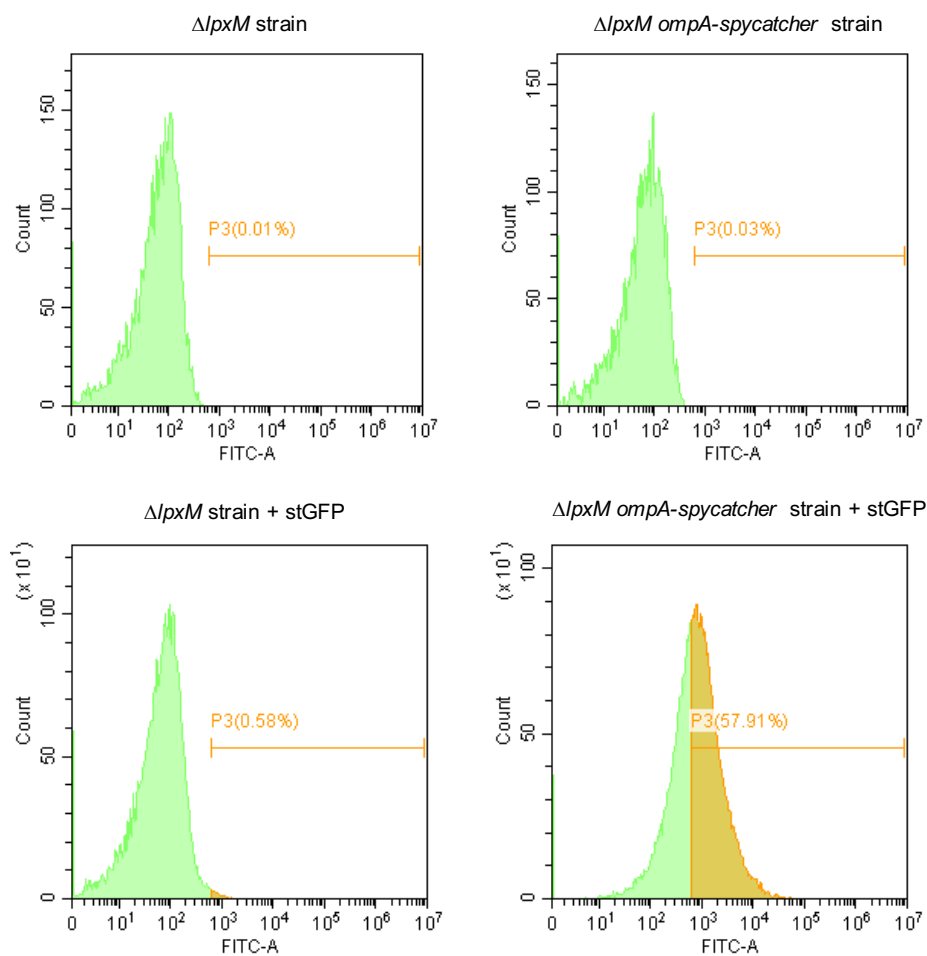

**Supplementary Figure 1. Flow cytometry analysis of the assembly between  $\Delta lpxM$  or  $\Delta lpxM$  *ompA-spycatcher* strains with stGFP.** Bacteria were collected and washed with PBS. Bacterial cell number for each group were adjusted to the same colony forming units (CFU) according to the OD<sub>600</sub>. Bacteria were incubated with or without 5  $\mu$ g stGFP at room temperature for 10 min. All samples were then washed three times with ice-cold PBS. The samples were subjected to flow cytometry analysis using FITC channel to detect the fluorescence.

#### 1.2 Supplementary Tables

**Supplementary Table 1. Bacterial strains and plasmids used in this study.**

| Strain Number | Genotype/Phenotype                | Source           |
|---------------|-----------------------------------|------------------|
| MG1655        | Wild type <i>Escherichia coli</i> | Laboratory stock |

|       |                                           |            |
|-------|-------------------------------------------|------------|
| JS09  | MG1655 $\Delta$ lpxM                      | This study |
| JS72  | MG1655 $\Delta$ lpxM ompA-spycatcher::kan | This study |
| pJS59 | pET28a-spytag-gfp, Kan+                   | This study |
| pJS73 | pET28a-spytag-sbi, Kan+                   | This study |
| pJS74 | pET28a-spytag-esxA, Kan+                  | This study |
| pJS79 | pET28a-spytag-spA, Kan+                   | This study |

Supplementary Table 2. Primers used in this study.

| Primers       | Sequences                                                                       |
|---------------|---------------------------------------------------------------------------------|
| dellpxM-1     | CACCAGATTGATTTTTGCCTTATCCGAAACTGGAAAAGCGCCGAT<br>CATATTCAATAACC                 |
| dellpxM-2     | TTATCATCAGGCGAAGGCCTCTCCTCGCGAGAGGCTTTTAAGCTT<br>ATCGATACCGTCGA                 |
| Colony-lpxM-1 | TAAACCAGCAGGCCGTAAAC                                                            |
| Colony-lpxM-2 | CATCCGGCCTACAGTTCAAT                                                            |
| ompASC-1      | GTGGACCAACAACATCGGTGACGCACACACCATCGGCACTGGCG<br>GCGGCGGCAGCGGCGCCATGGTTGATACCTT |
| ompASC-2      | GGTCGACGGATCCCCGGAATTTAGTGGTGGTGGTGGTGGTCA<br>ATATGAGCGTCACCTT                  |
| KN-1          | ATTCCGGGGATCCGTCGACC                                                            |
| KN-2          | GGTAGGAAACACCCAGGCTCAGCATGCCGTTGTCCGGACGTGTAG<br>GCTGGAGCTGCTTCG                |
| Colony-ompA-1 | GTTTCCGCGATTCTCTTCTG                                                            |
| Colony-ompA-2 | TAATGCGGAACACCAGCATA                                                            |
| ST-gfp-1      | TACAAGCCGACGAAGGGATCCGGCGGCGGCGGCAGCCGTAAAGG<br>CGAAGAGCTGTT                    |
| ST-gfp-2      | GTGCGGCCGCAAGCTTGTCGACTTTGTACAGTTCATCCATAC                                      |
| ST-esxA-1     | TACAAGCCGACGAAGGGATCCGGCGGCGGCGGCAGCGCAATGAT<br>TAAGATGAGTCC                    |
| ST-esxA-2     | GTGCGGCCGCAAGCTTGTCGACTTGCAAACCGAAATTATTAG                                      |
| ST-sbi-1      | TACAAGCCGACGAAGGGATCCGGCGGCGGCGGCAGCAACCCAGA<br>CCGACGTGTTGCA                   |
| ST-sbi-2      | GTGCGGCCGCAAGCTTGTCGACTACAAAGCGGTTGTTTTTATC                                     |
| ST-SPA-1      | TACAAGCCGACGAAGGGATCCGGCGGCGGCGGCAGCGCAAATGC<br>TGCGCAACACGATGAAGCTAAAAA        |
| ST-SPA-2      | GTGCGGCCGCAAGCTTGTCGACTTTCGGTGCTTGAGATTCGT                                      |
